# Supplementary material
Source: PubMed Central journal article supplement (PMC3017253)

**Appendix 1 (as supplied by the authors): Proportion of patients with early initiation of dialysis, Canada, 2001–2007.** Early initiation was defined as estimated glomerular filtration rate > 10.5 mL/min per 1.73 m<sup>2</sup>.

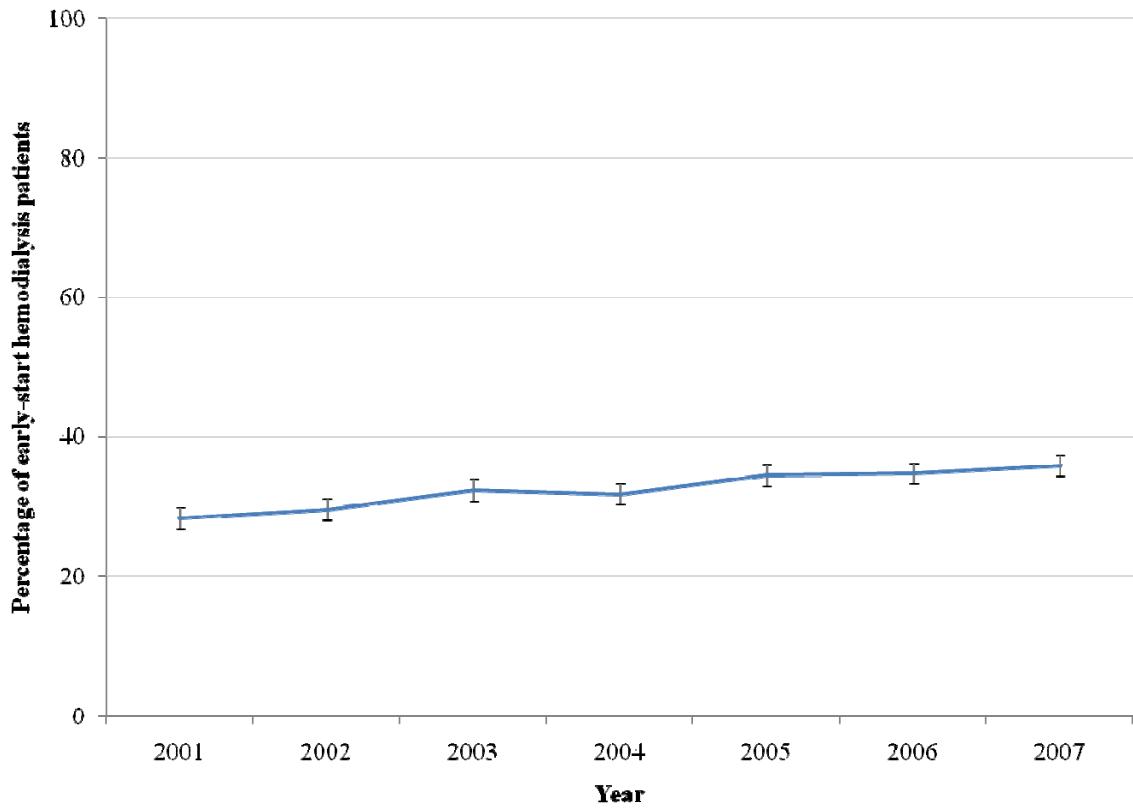

Supplement: 100349_1.pdf [file 100349_1.pdf]
