# Supplementary material
Source: PubMed Central journal article supplement (PMC3017253)
Supplement: 100349_2.pdf [file 100349_2.pdf]

**Appendix 2 (as supplied by the authors): Three-year Kaplan–Meier survival curves for early and late initiation of dialysis, Canada, 2001–2007.**

A: Unadjusted ( $p < 0.001$ ). B: Adjusted for baseline characteristics ( $p < 0.05$ ).

Early initiation was defined as estimated glomerular filtration rate  $> 10.5$  mL/min per  $1.73$  m<sup>2</sup>; late initiation was defined as estimated glomerular filtration rate  $\leq 10.5$  mL/min per  $1.73$  m<sup>2</sup>.

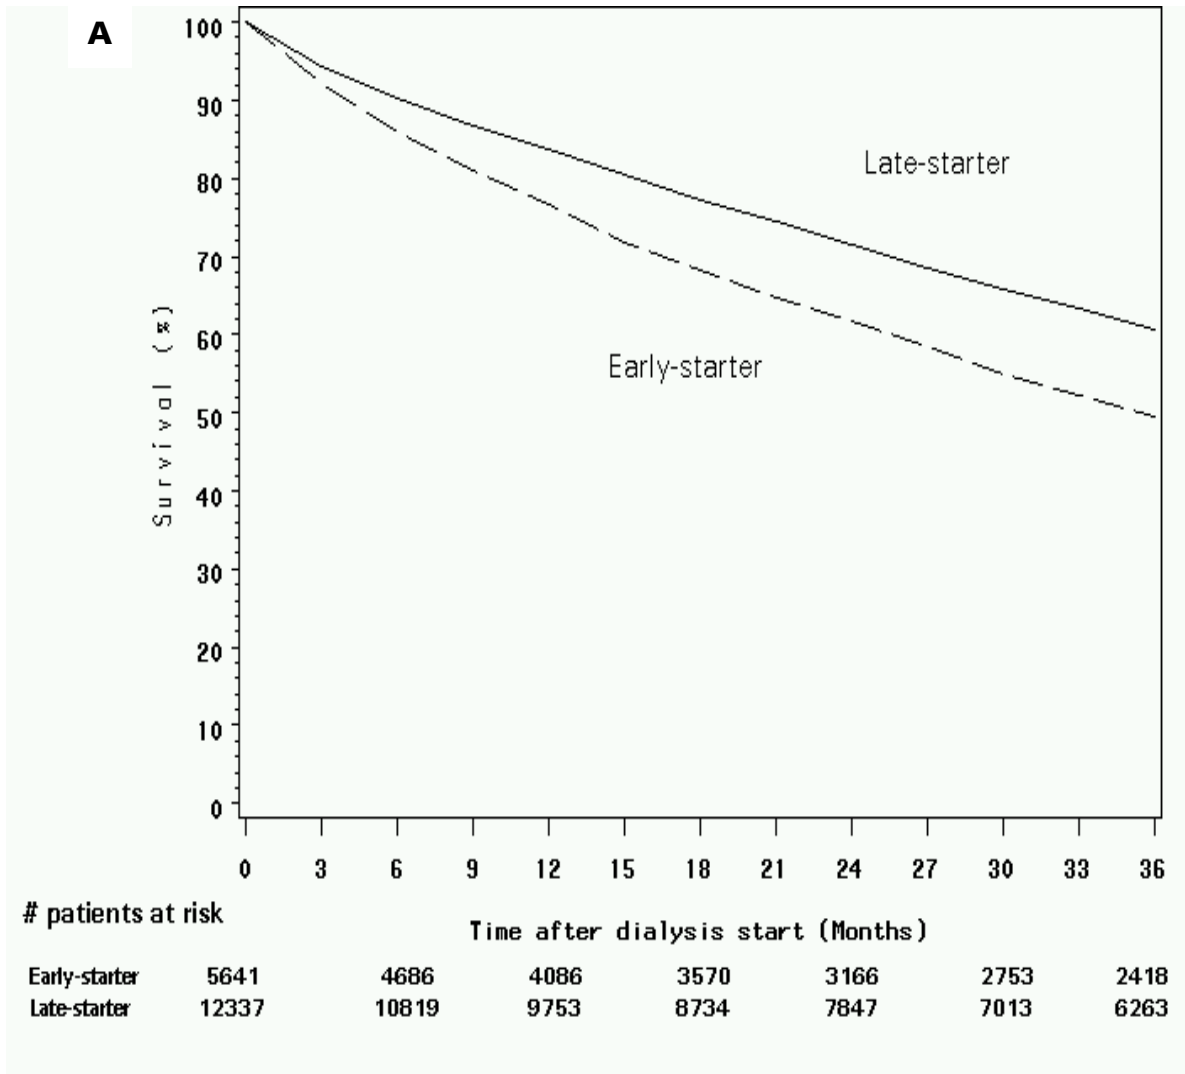

**B**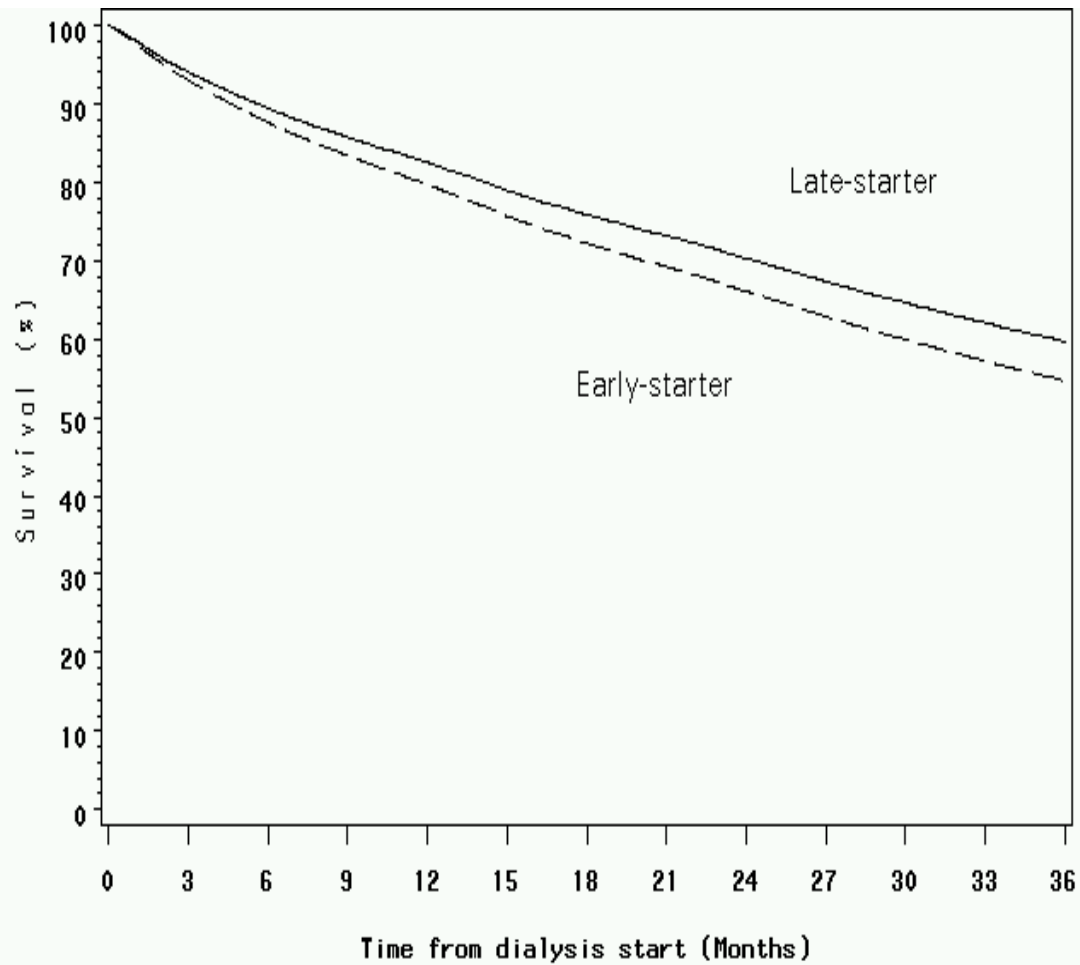

# patients at risk

|               |       |       |      |      |      |      |      |
|---------------|-------|-------|------|------|------|------|------|
| Early-starter | 5641  | 4686  | 4086 | 3570 | 3166 | 2753 | 2418 |
| Late-starter  | 12337 | 10819 | 9753 | 8734 | 7847 | 7013 | 6263 |
