# Supplementary material
Source: PubMed Central journal article supplement (PMC3017253)

**Appendix 3 (as supplied by the authors): Deaths per 1000 patient-years at risk, for patients with early and late initiation of dialysis, Canada, 2001–2007.** Early initiation was defined as estimated glomerular filtration rate > 10.5 mL/min per 1.73 m<sup>2</sup>; late initiation was defined as estimated glomerular filtration rate ≤ 10.5 mL/min per 1.73 m<sup>2</sup>. Data were adjusted for age and end-stage renal disease comorbidity index.

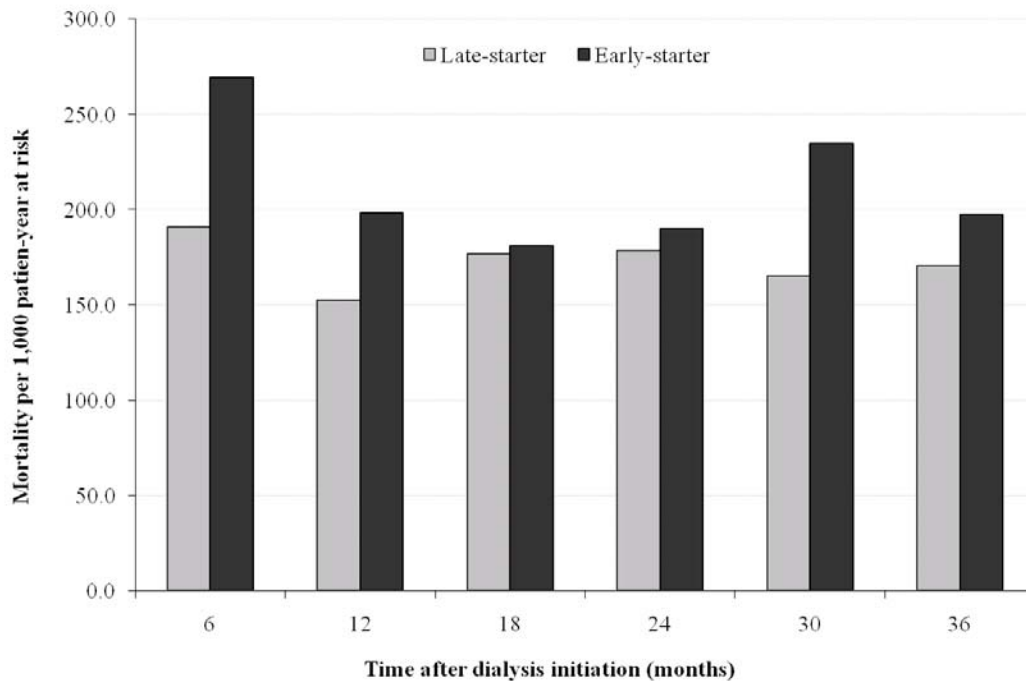

Supplement: 100349_3.pdf [file 100349_3.pdf]
