# Supplementary material
Source: PubMed Central journal article supplement (PMC3017253)
Supplement: 100349_5.pdf [file 100349_5.pdf]

**Appendix 5 (as supplied by the authors): Adjusted hazard ratios for mortality in 25 910 adult hemodialysis patients in Canada (2001–2007)**

| PREDICTORS                                       | Adjusted        |           |
|--------------------------------------------------|-----------------|-----------|
|                                                  | HR <sup>a</sup> | 95% CI    |
| Pre-dialysis Creatinine (per 100 µmol/L)         | 0.97            | 0.96-0.98 |
| <b>Demographic</b>                               |                 |           |
| Age (per 10-year increment)                      | 1.41            | 1.39-1.44 |
| Male                                             | 1.12            | 1.08-1.17 |
| Race (reference: Caucasian)                      |                 |           |
| Aboriginal                                       | 1.02            | 0.93-1.12 |
| Asian                                            | 0.65            | 0.59-0.72 |
| Black                                            | 0.54            | 0.47-0.63 |
| Indian subcontinent                              | 0.70            | 0.61-0.80 |
| Other                                            | 0.62            | 0.53-0.72 |
| Unknown                                          | 1.16            | 1.07-1.25 |
| <b>Clinical/comorbidities</b>                    |                 |           |
| Pre-dialysis serum albumin (per 1 g/dL increase) | 0.77            | 0.75-0.80 |
| Renal diagnosis (reference: Glomerulonephritis)  |                 |           |
| Diabetes                                         | 1.48            | 1.37-1.61 |
| Renal-vascular                                   | 1.26            | 1.16-1.38 |
| Unknown                                          | 1.50            | 1.37-1.64 |
| Other                                            | 1.55            | 1.42-1.69 |
| AVG/AVF vs. CVC access type                      | 0.73            | 0.69-0.77 |
| ESRD Comorbidity Index (reference: 0)            |                 |           |
| 1                                                | 1.34            | 1.23-1.46 |
| 2                                                | 1.20            | 1.13-1.27 |
| 3                                                | 1.42            | 1.32-1.52 |
| 4                                                | 1.42            | 1.33-1.52 |
| 5                                                | 1.74            | 1.62-1.87 |
| 6                                                | 1.86            | 1.71-2.03 |
| ≥7                                               | 1.90            | 1.74-2.08 |
| Late referral                                    | 1.14            | 1.09-1.19 |
| Transplanted <sup>b</sup>                        | 0.15            | 0.12-0.19 |

Abbreviations: AVG/AVF, arterial venous graft/arterial venous fistula; CI: confidence interval; CVC, central venous catheter; eGFR, estimated glomerular filtration rate; ESRD, end-stage renal disease; HR, hazard ratio.

<sup>a</sup>Hazard ratios estimated from a time-dependent Cox Proportional Hazards Regression.

<sup>b</sup>Transplant status was modeled as a time-varying effect.
